# Supplementary material for: Establishment of Stable Reporter Expression for In Vivo Imaging of Nuclear Factor-κB Activation in Mouse Liver
Source: PubMed Central journal article supplement — Theranostics. 2013 Oct 15;3(11):841–50. doi: 10.7150/thno.6997 (PMC3841335; doi:10.7150/thno.6997), 2013-10-15
Supplement: thnov03p0841s1.pdf [file thnov03p0841s1.pdf]

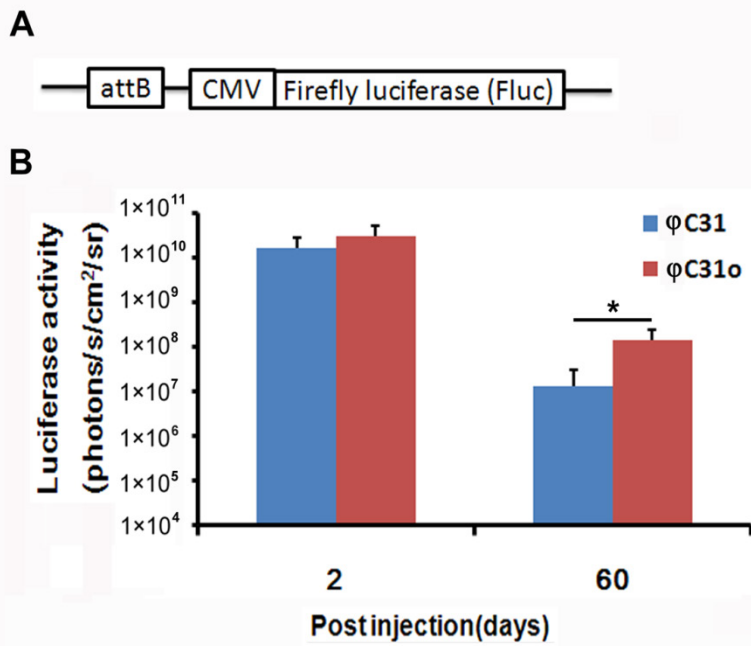

**Figure S1. Analysis of  $\phi$ C31 and  $\phi$ C31o integrase activity in mice livers.** (A) The schematic representation of the plasmid attB-Fluc. (B) Bioluminescence intensity of mice co-injected with attB-Fluc plus pCMV-int or Pphic31o on day 2 and 60 post injection (n=4).

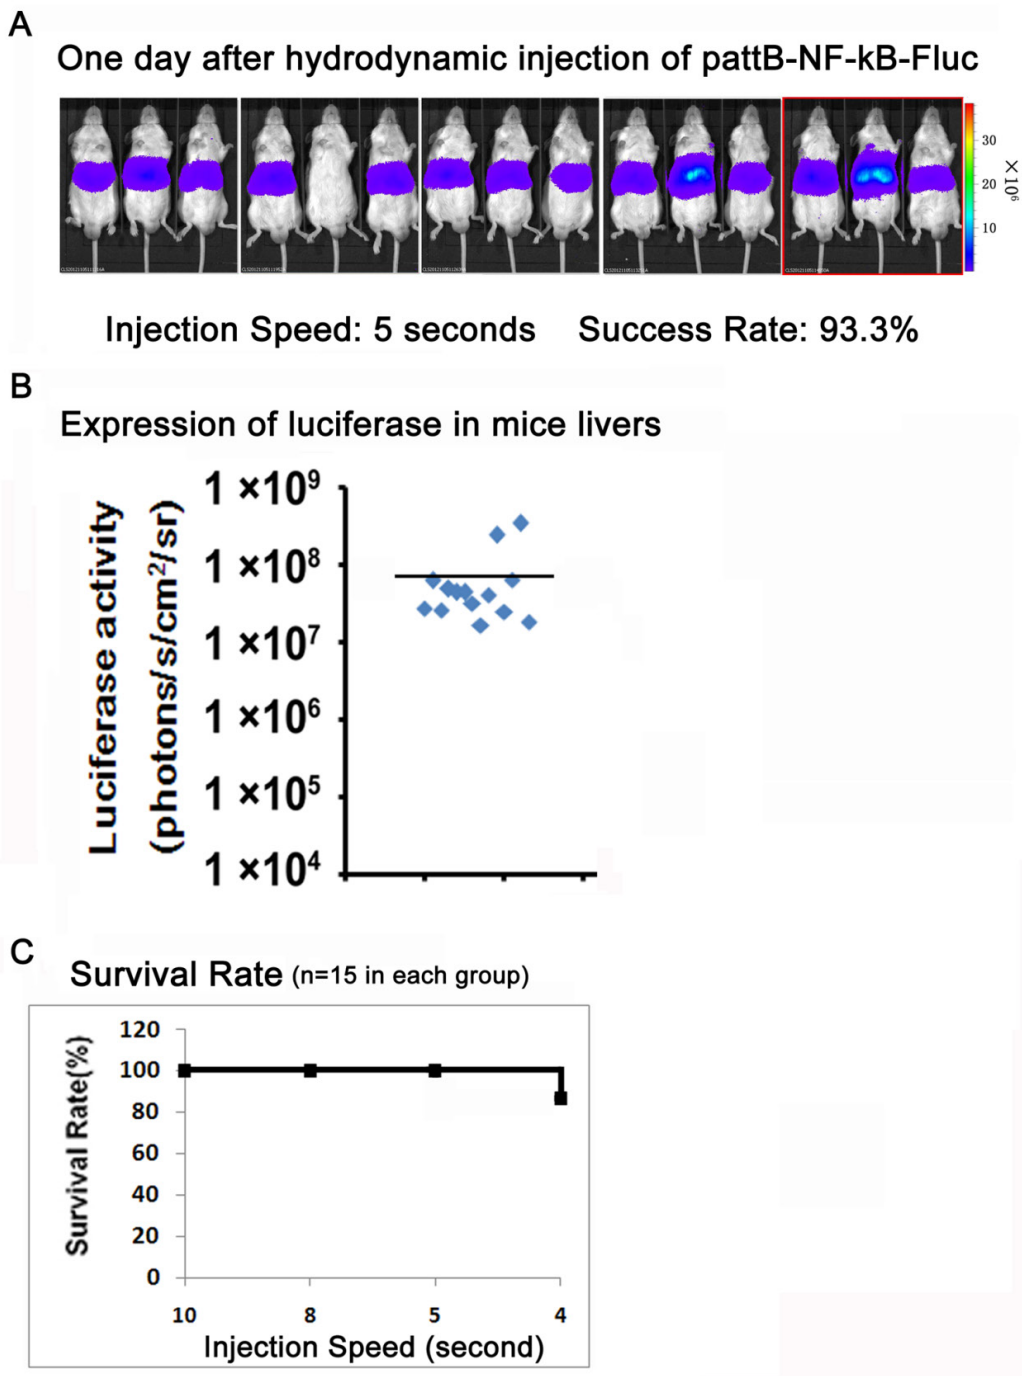

**Figure S2.** (A) The success rate of hydrodynamic injection of the pattB-NF-kB-Fluc reporter was monitored through bioluminescent imaging of the injected mice on one day after the injection, with 14 out of 15 injected mice showed expected luciferase expression in the liver. In another confirmation study, all the 15 injected mice showed luciferase expression in the liver on day one. (B) Bioluminescence intensity of the liver signals of all the mice was shown. (C) The survival rate of four groups (n=15) of animals that underwent hydrodynamic injection at different injection duration time of 10, 8, 5 and 4 seconds was shown.
